# Supplementary material for: Fluorescence detection of milk allergen β-lactoglobulin based on aptamers and WS2 nanosheets
Source: Royal Society of Chemistry journal article supplement (doi:10.1039/d2tb00263a), 2022-01-01
Supplement: d2tb00263a1.pdf [file d2tb00263a1.pdf]

## **Fluorescence detection of milk allergen $\beta$ -lactoglobulin based on aptamer and WS<sub>2</sub> nanosheets**

Chengyi Hong,<sup>a</sup> Jingjing Wang,<sup>a</sup> Yuying Wang,<sup>a</sup> Zhiyong Huang,<sup>a</sup> Hongfen Yang,<sup>c\*</sup>  
Dan Yang,<sup>d</sup> Ren Cai,<sup>b\*</sup> and Weihong Tan<sup>b</sup>

*a. College of Ocean Food and Biological Engineering, Fujian Provincial Key Laboratory of Food Microbiology and Enzyme Engineering, Jimei University, Xiamen, 361021, China.*

*b. Molecular Science and Biomedicine Laboratory, State Key Laboratory for Chemo/Bio-Sensing and Chemometrics, College of Chemistry and Chemical Engineering, College of Biology College of Material Science and Engineering, and Collaborative Research Center of Molecular Engineering for Theranostics, Hunan University, Changsha, 410082, China.*

*c. University of Texas at Austin, Austin, TX 78712, USA.*

*d. RMIT University, Melbourne, Australia.*

\* Corresponding author.

E-mail address: [cairen@hnu.edu.cn](mailto:cairen@hnu.edu.cn); [yanghf88@gmail.com](mailto:yanghf88@gmail.com).

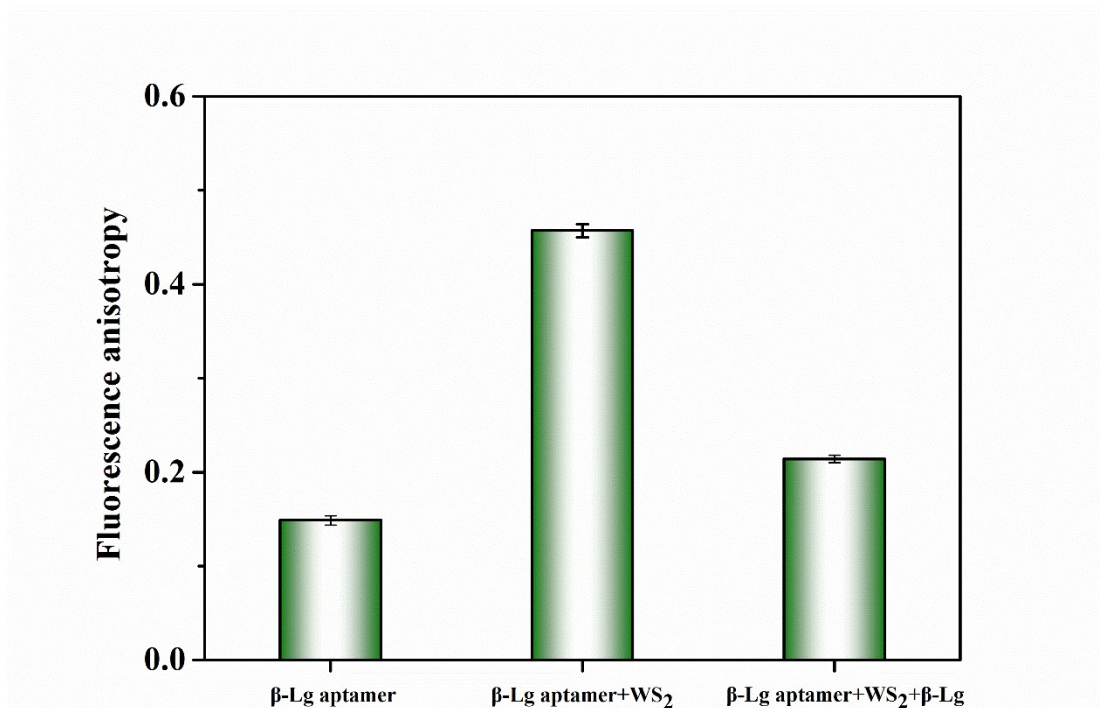

Fig. S1. The change of fluorescence anisotropy after FAM labeled  $\beta$ -Lg aptamer ( $50 \text{ nmol/L}$ ) interacted with  $\text{WS}_2$  nanosheet ( $200 \mu\text{g}\cdot\text{mL}^{-1}$ ) and target  $\beta$ -Lg ( $60 \mu\text{g}\cdot\text{mL}^{-1}$ ).

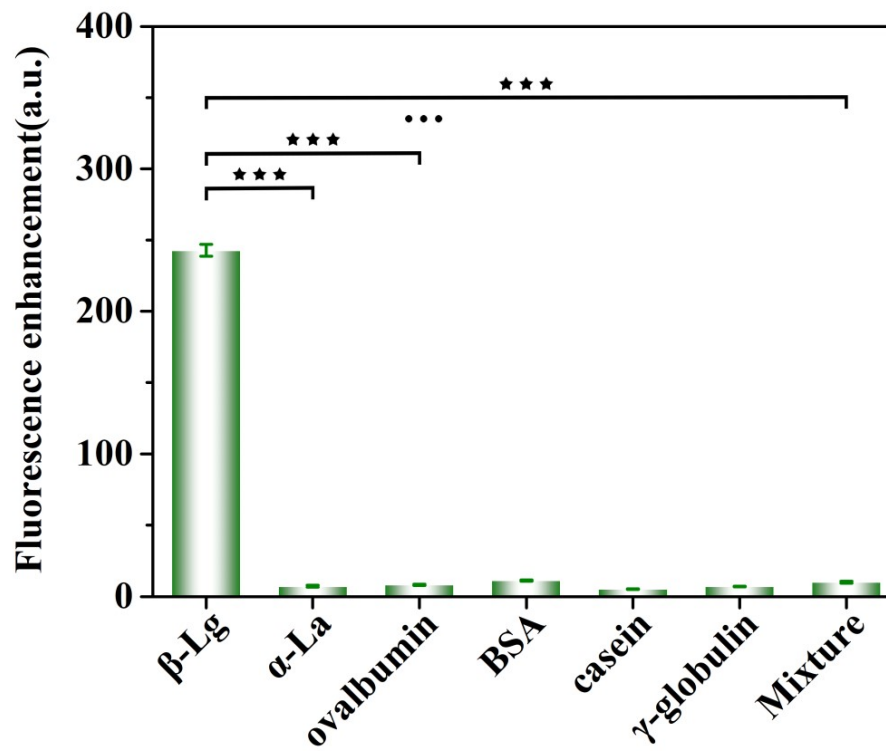

Fig. S2. The fluorescence enhancement of  $\beta$ -Lg ( $80 \mu\text{g}\cdot\text{mL}^{-1}$ ) and other interfering proteins ( $80 \mu\text{g}\cdot\text{mL}^{-1}$ ). Asterisks indicate statistically significant differences ( $p < 0.001$ ).

## Supporting Tables

**Table S1** Comparison of different methods for detection of  $\beta$ -Lg.

| Methods                   | Detection range<br>( $\mu\text{g}\cdot\text{mL}^{-1}$ ) | LOD<br>( $\mu\text{g}\cdot\text{mL}^{-1}$ ) | Ref       |
|---------------------------|---------------------------------------------------------|---------------------------------------------|-----------|
| HPLC                      | 20-560                                                  | 7                                           | [S1]      |
| LC-MS                     | 0.48-31.25                                              | 0.2                                         | [S2]      |
| HPLC                      | 0.4-60                                                  | 0.06                                        | [S3]      |
| Antibody-based ELISA      | 0.03125-8                                               | $1.96\times 10^{-3}$                        | [S4]      |
| Antibody-based ELISA      | 0.078-10                                                | 0.114                                       | [S5]      |
| Surface Plasmon Resonance | 0.49-1000                                               | 0.164                                       | [S6]      |
| Electrochemical method    | $530-1.1160\times 10^4$                                 | 270                                         | [S7]      |
| Electrochemical method    | $1\times 10^{-5}$ -1                                    | $7\times 10^{-6}$                           | [S8]      |
| Electrochemical method    | $1\times 10^{-5}$ -0.1                                  | $5.7\times 10^{-6}$                         | [S9]      |
| Fluorescence              | $2.5\times 10^{-4}$ -0.05                               | $3.7\times 10^{-5}$                         | [S10]     |
| Fluorescence              | 0.1-100                                                 | 0.0204                                      | This work |

**Table S2** Comparison of fluorescence assay results with commercial ELISA in five different milk samples.

| Milk Samples | methods   | detection result<br>( $\mu\text{g}\cdot\text{mL}^{-1}$ ) | calculated concentration<br>( $\text{g}\cdot\text{L}^{-1}$ ) | standard concentration<br>( $\text{g}\cdot\text{L}^{-1}$ ) | RSD (%) |
|--------------|-----------|----------------------------------------------------------|--------------------------------------------------------------|------------------------------------------------------------|---------|
| Sample 1     | This work | 88.27                                                    | 4.41                                                         | 4.56                                                       | 2.8     |
|              | ELISA     | 90.16                                                    | 4.51                                                         |                                                            | 3.1     |
| Sample 2     | This work | 82.31                                                    | 4.12                                                         | 3.96                                                       | 3.9     |
|              | ELISA     | 80.79                                                    | 4.04                                                         |                                                            | 4.3     |
| Sample 3     | This work | 75.66                                                    | 3.78                                                         | 3.84                                                       | 3.7     |
|              | ELISA     | 73.25                                                    | 3.66                                                         |                                                            | 4.9     |
| Sample 4     | This work | 72.58                                                    | 3.63                                                         | 3.60                                                       | 2.6     |
|              | ELISA     | 70.97                                                    | 3.55                                                         |                                                            | 3.5     |
| Sample 5     | This work | 68.03                                                    | 3.40                                                         | 3.48                                                       | 2.7     |
|              | ELISA     | 69.89                                                    | 3.49                                                         |                                                            | 3.2     |

**Table S3** Determination of  $\beta$ -Lg in infant formula.

| Samples | Spiked ( $\mu\text{g}\cdot\text{mL}^{-1}$ ) | Found ( $\mu\text{g}\cdot\text{mL}^{-1}$ ) | Recovery (%) | RSD (%) |
|---------|---------------------------------------------|--------------------------------------------|--------------|---------|
| 1       | 1                                           | 0.987                                      | 98.7%        | 3.9     |
| 2       | 10                                          | 10.35                                      | 103.5%       | 3.7     |
| 3       | 100                                         | 98.14                                      | 98.1%        | 2.4     |

## References

- [S1] L. I. Boitz, G. Fiechter, R. K. Seifried and H. K Mayer, *J. Chromatogr. A*, 2015, **1386**, 98-102.
- [S2] J. Ji, P. Zhu, F. Pi, C. Sun, J. Sun, M. Jia, C. Ying, Y. Zhang and X. Sun, *Food Control*, 2017, **74**, 79-88.
- [S3] Y. Ren, Z. Han, X. Chu, J. Zhang, Z. Cai and Y. Wu, *Anal. Chim. Acta*, 2010, **667**, 96-102.
- [S4] S. He, X. Li, J. Gao, P. Tong and H. Chen, *Food Chem.*, 2017, **227**, 33-40.
- [S5] J. Orcajo, M. Lavilla and I. Martínez-de-Marañón, *Anal. Chim. Acta*, 2019, **1052**, 163-169.
- [S6] J. Ashley, R. D'Aurelio, M. Piekarska, J. Temblay, M. Pleasants, L. Trinh, T. L. Rodgers and I. E. Tothill, *Biosensors*, 2018, **8**, 32.
- [S7] O. Surucu and S. Abaci, *J. Food. Meas. Charact.*, 2020, **14**, 11-19.
- [S8] S. Xu, B. Dai, W. Zhao, L. Jiang and H. Huang, *Anal. Chim. Acta*, 2020, **1120**, 1-10.
- [S9] Q. Qiu, X. Ni, T. Liu, Z. Li, X. An and X. Chen, *Analyst*, 2021, **146**, 6808-6814.
- [S10] M. Shi, Y. Cen, M. Sohail, G. Xu, F. Wei, Y. Ma, X. Xu, Y. Ma, Y. Song and Q. Hu, *Microchim. Acta*, 2018, **185**, 1-8.
